# Supplementary material for: Predictors of response to intra-arterial vasodilatory therapy of non-occlusive mesenteric ischemia in patients with severe shock: results from a prospective observational study
Source: PubMed Central journal article supplement (PMC8981621; doi:10.1186/s13054-022-03962-w), 2022-04-04

**A****L-FABP (ng/ml)**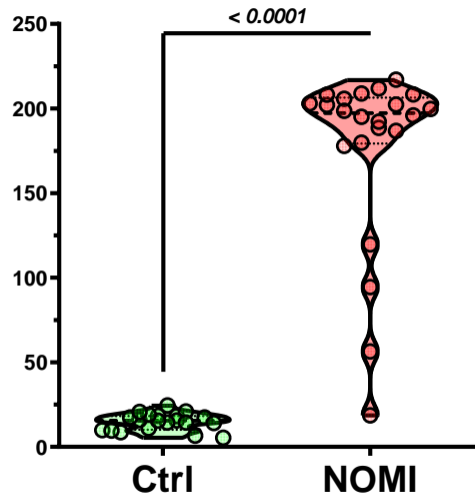**B****SM22 (pg/ml)**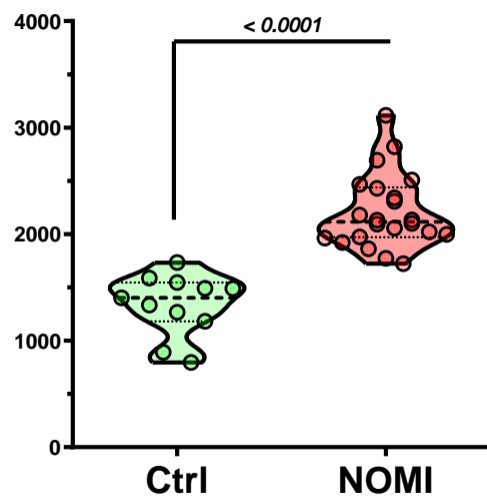**C****i-FABP (pg/ml)**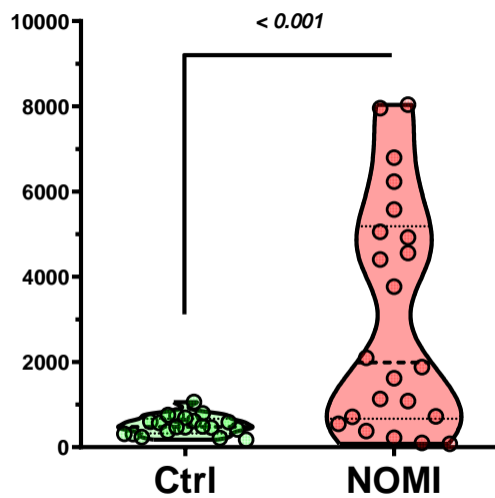

Supplement: 13054_2022_3962_MOESM3_ESM.pdf [file 13054_2022_3962_MOESM3_ESM.pdf]
